# Supplementary material for: First Report of Antimicrobial Susceptibility and Virulence Gene Characterization Associated with Staphylococcus aureus Carriage in Healthy Camels from Tunisia
Source: MDPI journal article supplement (doi:10.3390/ani11092754), 2021-09-21
Supplement: s1 [file s1]

**Supplementary Table:** Primers, amplicon size, and amplification conditions of staphylococcal virulence genes

| Virulence genes   | Primers      |                    | Sequence (5'–3')                                                | Size | PCR conditions                                                                         |
|-------------------|--------------|--------------------|-----------------------------------------------------------------|------|----------------------------------------------------------------------------------------|
| Enterotoxin genes | sea          | SEA-1<br>SEA-2     | GAAAAAAGTCTGAATTGCAGGGAACA<br>CAAATAAAATCGTAATTAACCGAAGGTTC     | 560  | 95 °C × 5 min, 35 × (95 °C × 30 s, 55 °C × 30 s, 72 °C × 1 min) 72 °C × 10 min, 4 °C   |
|                   | seb          | SEB-1<br>SEB-2     | ATTCTATTAAGGACACTAAGTTAGGGA<br>ATCCCGTTTCATAAGGCGAGT            | 404  |                                                                                        |
|                   | Sec          | mpSEC-1<br>mpSEC-2 | GTAAAGTTACAGGTGGCAAAACTTG<br>CATATCATACCAAAAAGTATTGCCGT         | 297  |                                                                                        |
|                   | sed          | SED-1<br>SED-2     | GAATTAAGTAGTACCGCGCTAAATAATATG<br>GCTGTATTTTTCTCCGAGAGT         | 492  |                                                                                        |
|                   | see          | SEE-1<br>SEE-2     | CAAAGAAATGCTTTAAGCAATCTTAGGC<br>CACCTTACCGCCAAAGCTG             | 482  | 95 °C × 5 min, 35 × (95 °C × 1 min, 55 °C × 1 min, 72 °C × 1 min) 72 °C × 10 min, 4 °C |
|                   | seg          | SEG-1<br>SEG-2     | AATTATGTGAATGCTCAACCCGATC<br>AAACTTATATGGAACAAAAGGTACTAGTTC     | 642  | 95 °C × 5 min, 35 × (95 °C × 2 min, 55 °C × 2 min, 72 °C × 1 min) 72 °C × 10 min, 4 °C |
|                   | seh          | SEH-1<br>SEH-2     | CAATCACATCATATGCGAAAGCAG<br>CATCTACCCAAACATTAGCACC              | 376  |                                                                                        |
|                   | sei          | SEI-1<br>SEI-2     | CTCAAGGTGATATTGGTGTAGG<br>AAAAAACTTACAGGCAGTCCATCTC             | 576  | 95 °C × 5 min, 35 × (95 °C × 45 s, 62 °C × 45 s, 72 °C × 1 min) 72 °C × 10 min, 4 °C   |
|                   | sej          | mpSEJ-1<br>mpSEJ-2 | TAACCTCAGACATATATACTTCTTTAACG<br>AGTATCATAAAGTTGATTGTTTTCATGCAG | 300  | 95 °C × 5 min, 30 × (95 °C × 1 min, 63 °C × 1 min, 72 °C × 1 min) 72 °C × 10 min, 4 °C |
|                   | sem          | mpSEM-1<br>mpSEM-2 | CTATTAATCTTTGGGTTAATGGAGAAC<br>TTCAGTTTCGACAGTTTTGTTGTCAT       | 300  | 95 °C × 5 min, 30 × (95 °C × 1 min, 55 °C × 1 min, 72 °C × 1 min) 72 °C × 10 min, 4 °C |
|                   | sen          | mpSEN-1<br>mpSEN-2 | ATGAGATTGTTCTACATAGCTGCAAT<br>AACTCTGCTCCCACTGAAC               | 680  |                                                                                        |
| Exfoliative genes | eta          | mpETA-1<br>mpETA-3 | ACTGTAGGAGCTAGTGCATTGT<br>TGGATACTTTTGCTATCTTTTCATCAAC          | 190  | 95 °C × 5 min, 30 × (95 °C × 1 min, 49 °C × 1 min, 72 °C × 1 min) 72 °C × 10 min, 4 °C |
|                   | etb          | mpETB-1<br>mpETB-2 | CAGATAAAGAGCTTTATACACACATTAC<br>AGTGAACCTATCTTTCTATTGAAAAACACTC | 612  | 95 °C × 5 min, 30 × (95 °C × 1 min, 55 °C × 1 min, 72 °C × 1 min) 72 °C × 10 min, 4 °C |
|                   | siet         | Siet1<br>Siet2     | ATGGAAAAATTTAGCGGCATCTGG<br>CCATTACTTTTCGCTTGTTGTGC             | 359  | 95 °C × 5 min, 35 × (95 °C × 45 s, 56 °C × 1 min, 72 °C × 1 min) 72 °C × 10 min, 4 °C  |
| Hemolysins        | α-haemolysin | HLA-1<br>HLA-2     | CTGATTACTATCCAAGAAATTCGATTG<br>CTTCCAGCCTACTTTTTTATCAGT         | 209  | 95 °C × 5 min, 30 × (95 °C × 1 min, 58 °C × 1 min, 72 °C × 1 min) 72 °C × 10 min, 4 °C |
|                   | β-haemolysin | HLB-1<br>HLB-2-2   | GTGCACTTACTGACAATAGTGC<br>GTTGATGAGTAGCTACCTTCAGT               | 309  |                                                                                        |

|                                   |                                 |                      |                                                                  |      |                                                                                        |
|-----------------------------------|---------------------------------|----------------------|------------------------------------------------------------------|------|----------------------------------------------------------------------------------------|
|                                   | delta-hemolysin                 | HLD-1<br>HLD-2       | AAGAATTTTTATCTTAATTAAGGAAGGAGTG<br>TtagtGAATTTGTTCACTGTGTCTGA    | 111  | 95 °C × 5 min, 30 × (95 °C × 45 s, 55 °C × 45 s, 72 °C × 1 min) 72 °C × 10 min, 4 °C   |
|                                   | γ haemolysin A, B, and C        | mpHLG-1<br>mpHLG-2   | GTCATAGAGTCCATAATGCATTTAA<br>CACCAAATGTATAGCCTAAAGTG             | 535  |                                                                                        |
|                                   | γ- Haemolysin variant           | mpHLG2-1<br>mpHLG2-2 | GACATAGAGTCCATAATGCATTTGT<br>ATAGTCATTAGGATTAGGTTTCACAAAG        | 390  |                                                                                        |
| Leucocidins                       | PVL S and F                     | PVL-1<br>NPVL-2      | ATCATTAGGTAAAAATGTCTGGACATGATCCA<br>GCATCAASTGTATTGGATAGCAAAAGC  |      |                                                                                        |
|                                   | LukE-lukD                       | LUKDE-1<br>LUKDE-2   | TGAAAAAGGTTCAAAGTTGATACGAG<br>TGTATTCGATAGCAAAAGCAGTGCA          | 269  | 95 °C × 5 min, 30 × (95 °C × 1 min, 58 °C × 1 min, 72 °C × 2 min) 72 °C × 10 min, 4 °C |
|                                   | LukM                            | LUKM-1<br>LUKM-2     | TGGATGTTACCTATGCAACCTAC<br>GTTTCGTTTCCATATAATGAATCACTAC          |      |                                                                                        |
| Adhesin factors                   | Clumping factors                | clfA F<br>clfA R     | GTAGGTACGTTAATCGGTT<br>CTCATCAGGTTGTTCAAGG                       | 1586 | 95 °C × 5 min, 30 × (95 °C × 30 s, 50 °C × 30 s, 72 °C × 1 min) 72 °C × 10 min, 4 °C   |
|                                   |                                 | clfB F<br>clfB R     | TGCAAGATCAAACCTGTTCTT<br>TCGGTCTGTAAATAAAGGTA                    | 596  |                                                                                        |
|                                   | fibronectin binding protein fnb | FNBA-F<br>FNBA-R     | GTGAAGTTTTAGAAGGTGGAAAGATTAG<br>GCTCTTGTAAGACCATTTTTCTTCAC       | 643  | 95 °C × 5 min, 30 × (95 °C × 30 s, 57 °C × 30 s, 72 °C × 1 min) 72 °C × 10 min, 4 °C   |
|                                   |                                 | FNBB-F<br>FNBB-R     | GTAACAGCTAATGGTCGAATTGATACT<br>CAAGTTCGATAGGAGTACTATGTTC         | 524  |                                                                                        |
| Fibrinogen binding protein        |                                 | Fib1<br>Fib2         | CTACAAC TACAATTGCCGTCAACAG<br>GCTCTTGTAAGACCATTTTCTTCAC          | 404  | 95 °C × 5 min, 30 × (95 °C × 1 min, 57 °C × 1 min, 72 °C × 1 min) 72 °C × 10 min, 4 °C |
| Collagen binding protein          |                                 | Cbp1<br>Cbp2         | GTCAAGCAGTTATTAACACCAGAC<br>AATCAGTAATTGCACTTTGTCCACTG           | 423  | 95 °C × 5 min, 30 × (95 °C × 45 s, 62 °C × 45 s, 72 °C × 1 min) 72 °C × 10 min, 4 °C   |
| Bone sialoprotein binding protein |                                 | bsp1<br>bsp2         | AACTACATCTAGTACTCAACAACAG<br>ATGTGCTTGAATAACACCATCATCT           | 575  | 95 °C × 5 min, 30 × (95 °C × 45 s, 60 °C × 45 s, 72 °C × 1 min) 72 °C × 10 min, 4 °C   |
| Laminin Binding Protein           |                                 | Lamin1<br>Lamin2     | ACGTGCAGCAGCTGACT<br>CAACAGCATTCTTCAGTACCTTC                     | 302  | 95 °C × 5 min, 30 × (95 °C × 1 min, 55 °C × 1 min, 72 °C × 2 min) 72 °C × 10 min, 4 °C |
| Encoding elastin binding Protein  |                                 | ebp1<br>ebp2         | CATCCAGAACCAATCGAAGAC<br>CTTAACAGTTACATCATCATGTTTATCTTTG         | 186  | 95 °C × 5 min, 30 × (95 °C × 1 min, 55 °C × 1 min, 72 °C × 1 min) 72 °C × 10 min, 4 °C |
| Capsule proteins                  | capsule type 5                  | Cap5k1<br>Cap5k2     | GTCAAAGATTATGTGATGCTACTGAG<br>ACTTCGAATATAAACTTGAATCAATGTTATACAG | 361  | 95 °C × 5 min, 30 × (95 °C × 30 s, 50 °C × 30 s, 72 °C × 1 min) 72 °C × 10 min, 4 °C   |
|                                   | capsule type 8                  | Cap8k1<br>Cap8k2     | GCCTTATGTTAGGTGATAAACC<br>GGAAAAACACTATCATAGCAGG                 | 173  |                                                                                        |
